# Supplementary material
Source: PubMed Central journal article supplement (PMC2929599)
Supplement: NIHMS91371-supplement-1_si_001.pdf [file NIHMS91371-supplement-1_si_001.pdf]

## Supporting Information

### **The Mechanisms of Human Hotdog Fold Thioesterase 2 (hTHEM2) Substrate Recognition and Catalysis Illuminated by a Structure and Function Based Analysis<sup>#</sup>**

Jian Cao<sup>1+</sup>, Hang Xu<sup>2+</sup>, Hong Zhao<sup>1</sup>, Weimin Gong<sup>2\*</sup> and Debra Dunaway-Mariano<sup>1\*</sup>,

*<sup>1</sup>Department of Chemistry and Chemical Biology, University of New Mexico,*

*Albuquerque, NM 87131 and <sup>2</sup>National Laboratory of Biomacromolecules, Institute of Biophysics, Chinese Academy of Sciences, Beijing 100101, P. R. China*

**Contents:** Seven pages total which include Table SI1 (steady state kinetic constants measured for hTHEM2 catalysis as function of NaCl concentration), Figures SI1-5 (graphic figures depicting hTHEM2 structure) and Figure SI6 (sequence alignment of hTHEM2 homologs).

Table SII. The steady state kinetic constants measured for hTHEM2 catalyzed hydrolysis of 3-hydroxyphenylacetyl-CoA in solutions containing 50 mM K<sup>+</sup>HEPES (pH 7.5 and 25 °C), 1 mM DTNB and varying concentrations of NaCl. The error limits shown reflect the fit to a data set and do not represent the standard deviation calculated from repetitive determination.

| [NaCl] (mM) | $k_{\text{cat}}$ (s <sup>-1</sup> ) | $K_m$ (μM) | $k_{\text{cat}}/K_m$ (s <sup>-1</sup> μM <sup>-1</sup> ) |
|-------------|-------------------------------------|------------|----------------------------------------------------------|
| 0           | 1.44 ± 0.07                         | 30 ± 5     | 4.8 × 10 <sup>4</sup>                                    |
| 1           | 1.48 ± 0.02                         | 47 ± 2     | 3.1 × 10 <sup>4</sup>                                    |
| 10          | 1.50 ± 0.10                         | 40 ± 10    | 3.7 × 10 <sup>4</sup>                                    |
| 50          | 1.43 ± 0.04                         | 38 ± 3     | 3.7 × 10 <sup>4</sup>                                    |
| 100         | 1.20 ± 0.06                         | 30 ± 6     | 4.0 × 10 <sup>4</sup>                                    |

Figure S11: The existence of chloride ions as shown by the difference anomalous Fourier map constructed using anomalous difference signal and phases calculated from protein only. The densities of chloride ion (green) and the undecan-2-one-CoA sulfur atom (yellow) were observed in the map because these two atoms have similar anomalous signals at Cu K-alpha wavelength ( $f''\text{-Cl}=0.7e$ ,  $f''\text{-S}=0.6e$ ).

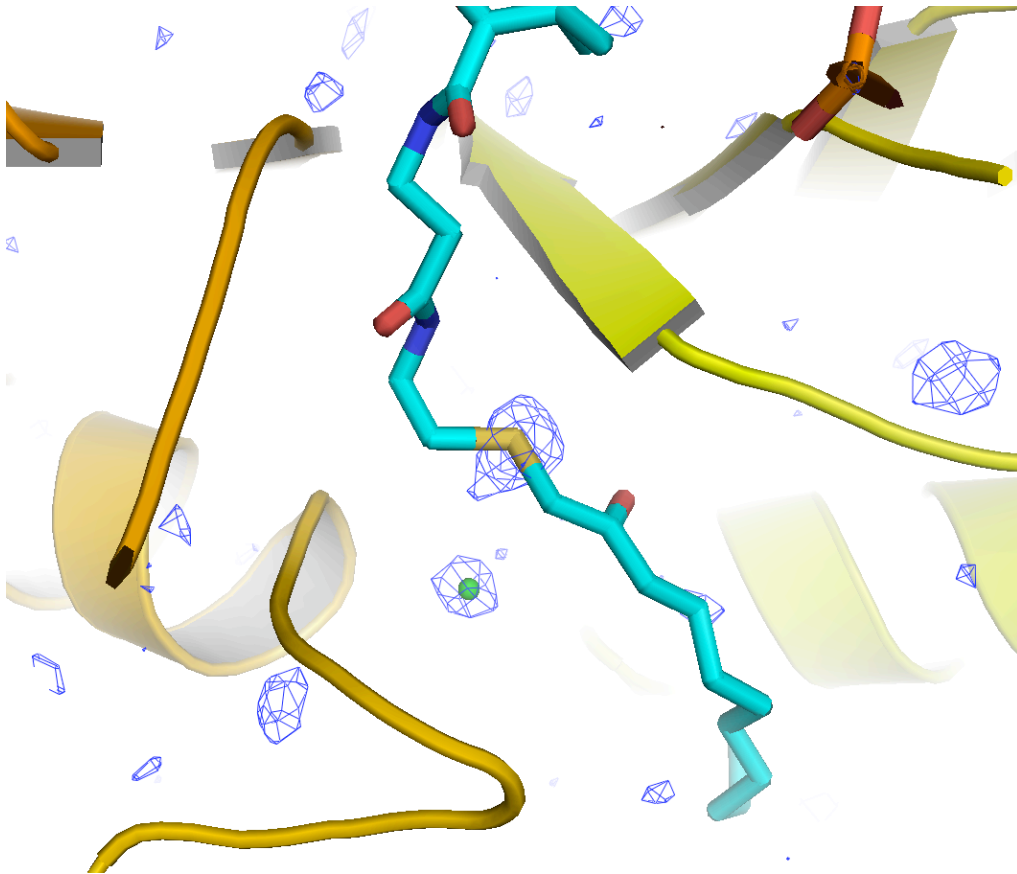

Figure SI2. Superposition of the main chain of the apo tetrameric hTHEM2 and the main chain of the undecan-2-one-CoA bound tetrameric hTHEM2

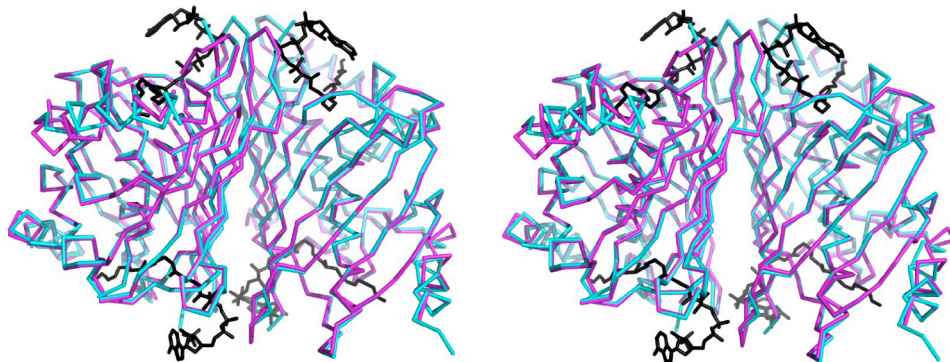

Figure SI3: The undecan-2-one-CoA (yellow) binding site formed by protomers I (cyan), II (green) and III (magenta).

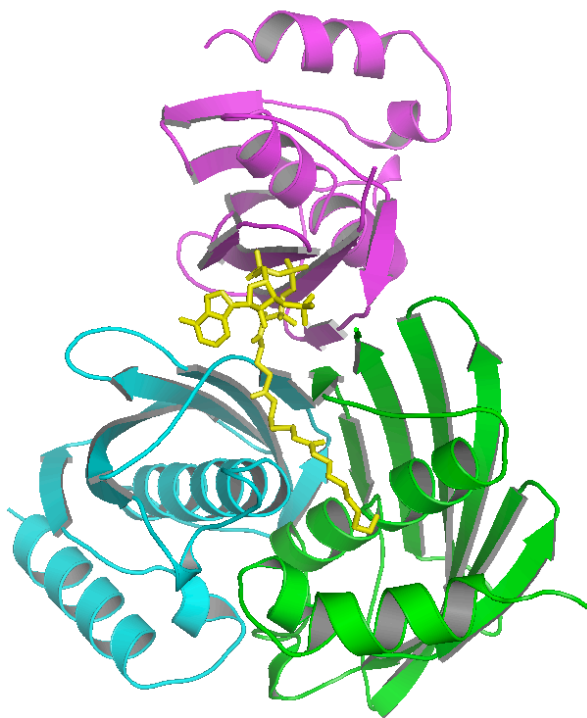

Figure SI4. A zoom in on the undecan-2-one-CoA ligand I O=C-CH<sub>2</sub>S unit and the surrounding residues.

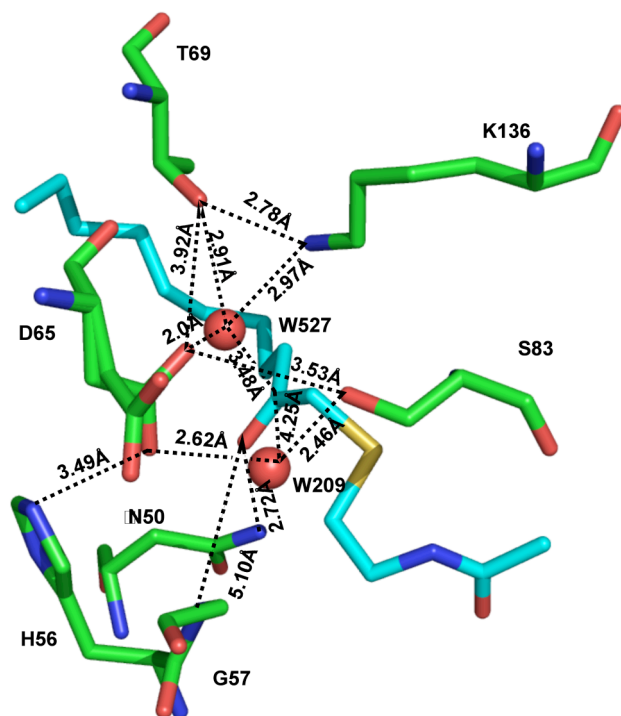

Figure SI5: Stereoview of the superposition of the hTHEM2 active site with undeca-2-one-CoA (cyan) bound and decanoyl-CoA (black) modeled.

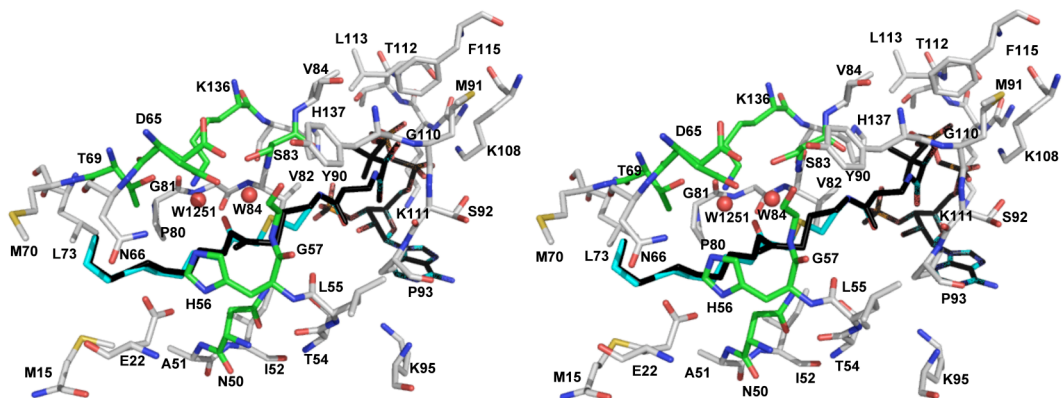

Figure SI6: Alignment of hTHEM2 eukaryotic homolog sequences having 42% or greater identity. Identical residues are highlighted in green color, similar residues are highlighted in yellow color, and the tetramerization residues are highlighted in magenta color.

```

hTHEM2      -----MTSMTQSLREVIKAMTKAR-NFERVLGKIT---LVSAAPGKVICEMKVEE 46
Q5R833      -----MTSMTQSLREVIKAMTKAR-NFERVLGKIT---LVSAAPGKVICEMKVEE 46
Q9CQR4      -----MSSMTQNLREVMKVMFKVP-GFDRVLEKVT---LVSAAPEKLICEMKVEE 46
A6QQ83      -----MIWVKKAKTLLLEWLTHSGKFN-GFDRNLEKVT---LVSAAPGKLICEMKVEE 48
Q1LU96      -----MASLTLNVTVKQIFRAMADSP-GFDRVLSKV---EVLSAAPGKVVCEMKVEE 47
Q1LWU4      -----MASLTLNAVQIFRAMADSP-GFDRVLSKVSVEVLSAAPGKVVCEMKVEE 50
Q6DER5      -----MSSLSTSTVRAIFKALGDGP-GFDRVLSKLN---LVSAAPGKVVCELVVEE 47
Q7QJ30      -----MSGKKGLDLLRTIATVMTRKTN-GYDRCLQQ---LVMVSGGDGRCAEFKVEE 48
Q29FB2      -----KRGVDFVKHVAEYAASKG-GFDRVLKLM---IKITGGGDGRAIGEFTVEK 45
A7SG16      -----MAALLRKGQLWTFMTKNNPGFDRVLEK---AELAAFGGGRCIIKMTVSQ 47
Q1HPG9      -----MGTGKIKIAELFTKTIATK-GFDQNLRK---LKVTSCEGNGSMVTEFQVGP 47
A9PCW5      MDLESVKRYLETGGYEEDKNASTIEKMPLRFFERFIMQG--LHIDLIEPGRVVCMSKVP 58
B0FVM1      -----AKEPMVAKLPHRFLEFVTVNG--LKVDLIEPGRIVCSMKIPP 40
A8WU80      -----MASKYMLAKEIVKNFNGKG-NFAGVSGAGN-CRAIHAEEGNIRVEFEVEK 49
Q18187      -----MPSKYMLAKEI IKNYGTKG-QFGCVSGAGN-VRAVHAEEGNLRVEFEVEK 49

hTHEM2      EHTNAIGTLHGGLTATLVDNIS TMA LLCTE-RGAPGVSVDMNITYMSPAKLGEDIVITAH 105
Q5R833      EHTNAIGTLHGGLTATLVDNIS TMA LLCTE-RGAPGVSVDMNITYMSPAKLGEDIVITAH 105
Q9CQR4      QHTNKLGLTHGGGLTATLVDSIS TMA LMCTE-RGAPGVSVDMNITYMSPAKIGEEIVITAH 105
A6QQ83      QHANKMGLTHGGMIA TLVDVIS S LALLCTE-RGISGVSVDMNITYMSPAKVGEDILITAH 107
Q1LU96      QHTNRGGTLHGGMATLVDMISTMAIMYSE-RGAPGVSVDMNITYMNAAKIGEDILITAO 106
Q1LWU4      QHTNRGGTLHGGMATLVDMISTMAIMYSE-RGAPGVSVDMNITYMNAAKIGEDILITAO 109
Q6DER5      EHTNRGGTLHGGLTATLVDTVS TVALLHTE-RGAPGVSVDMNITYMNAAKIGDSVLITAO 106
Q7QJ30      EHLNRAGGLHGGYTATIVDVV TTYALMSTG--SHPGV TATLNVSYMSAAKPGELVEIDAR 103
Q29FB2      EHLNRQGLTHGGGLTATIVDNV TTYALMSTG--SHPGV TATLNVSYMSAAKPGELVEIDAR 103
A7SG16      EHENRMGTLHGGLTATMVDV TMA IISQT--GQAGV SVDMNISYLKAAACRGDEVIFEGI 105
Q1HPG9      EHLNRGTLHGGLTATLVDV DAI STYAL TNENV DTRGV SIDLSL SFYSA AKEGDNIEVEAK 107
A9PCW5      RLLNGGNFLHGGATATLV D LVGSA AIFTVG-APATGV SVEINVS YLDA AFDEIEIEAR 117
B0FVM1      HLLNAGFLHGGATATLV D LIGSAVIYTAG-ASHSV SVEINVS YLDA AFLDEIEIESK 99
A8WU80      DQTNHFETLHGGCTATLIDNY TTAALL LTK-QARPGV SVDLHV TYLSAAKIGETLVDST 108
Q18187      DQSNHFNTLHGGCTSTLID IFTTGA LL LTK-PARPGV SVDLHV TYLTA AKIGETLVDST 108

*          ***          *          **          *
hTHEM2      VLKQKTLAFTSVDLTNKATGKLI AQGRHTKHLGN----- 140
Q5R833      VLKQKTLAFTSVDLTNKATGKLI AQGRHTKHLGN----- 140
Q9CQR4      ILKQKTLAFASVDLTNKTTGKLI AQGRHTKHLGN----- 140
A6QQ83      VLKEGRSLSFASVDLMNKATGKLI AQGRHTKHMGNRPPEGSVKKSNE--- 155
Q1LU96      VLKQCRTLAFATVDLTNKANGKLI AQGRHTKHLGS----- 141
Q1LWU4      VLKQCRTLAFATVDLTNKANGKLI AQGRHTKHLGS----- 144
Q6DER5      VLKQCRTLAFATVDVTNKVSGKLI AQGRHTKHLGN----- 141
Q7QJ30      TVRAGRNLAFLECELRHKDNS IIAKASHTKYIGSS----- 143
Q29FB2      TLRAGRKMAYLDCVLRKSDGR IILASGGQV KYVDFDQE----- 141
A7SG16      CNKAGKNLAFSTAEIKLK--DGTVLAMGKHTKYIGNSPKVIDFDGNCNQTLY 155
Q1HPG9      TRKTGKILAFLEVEVRNKKDNQV LASGRHTKYIGI----- 142
A9PCW5      VLRVKGAVGVSVVELKKKTGK IIAQGRHTKYLAVPSKL----- 156
B0FVM1      ALRVGKAVAVVSVELRKTGK IIAQGRHTKYFAP----- 134
A8WU80      VTKQGRTLAFTKAELYRKRDNVMIATGVHTKAF PAMKSE----- 148
Q18187      VIKQKTLAFTKAELYRKRDNVMIATGVHTKAF PTVKKN----- 148

*          *          *          *

```
